# Supplementary material for: Enhanced thermoelectric transport properties of n-type InSe due to the emergence of the flat band by Si doping
Source: Royal Society of Chemistry journal article supplement (doi:10.1039/c9qi00210c), 2019-01-01
Supplement: c9qi00210c1.pdf [file c9qi00210c1.pdf]

Electronic Supplementary Information

# Enhanced thermoelectric transport properties of *n*-type InSe due to emergence of flat band by Si doping

Kyu Hyung Lee, Min-Wook Oh, Hyun-Sik Kim, Weon Ho Shin, Kimoon Lee, Jae-Hong Lim, Ji-il Kim, and Sang-il Kim

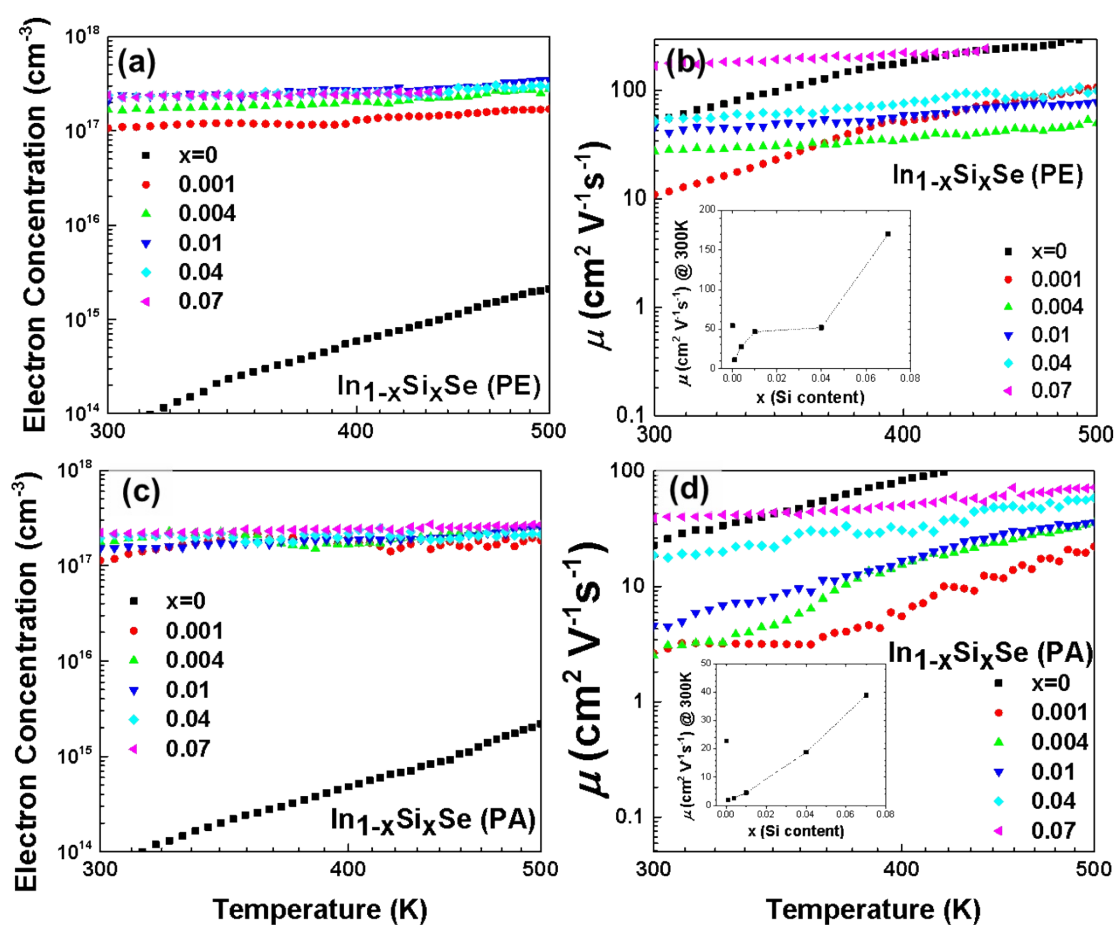

**Figure S1.** Carrier concentration and mobility in the range of 300 to 500 K in the PE and PA directions with respect to the pressing direction.
